# Supplementary material
Source: PubMed Central journal article supplement (PMC1851061)

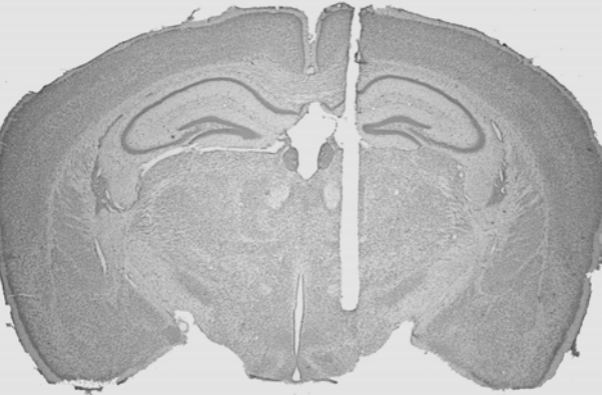

Supplement: pnas_0609625104_1.pdf [file pnas_0609625104_1.pdf]

**a****Wild Type**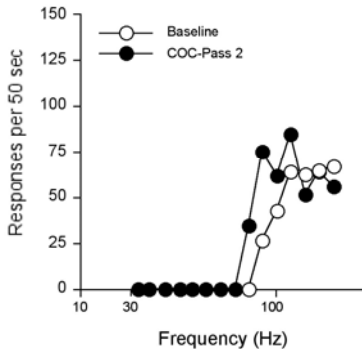**b*****Clock* mutant**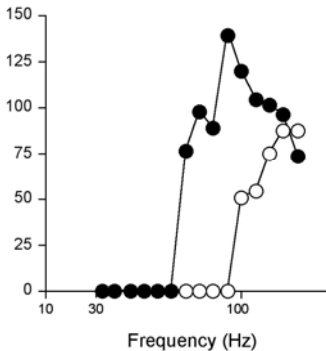

Supplement: pnas_0609625104_2.pdf [file pnas_0609625104_2.pdf]

**a**

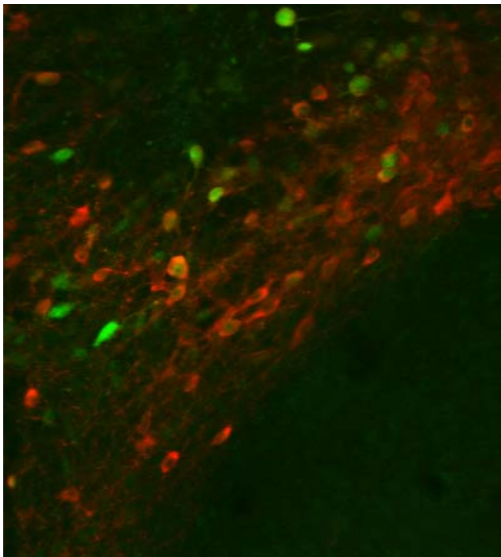

**b**

Supplement: pnas_0609625104_3.pdf [file pnas_0609625104_3.pdf]
